# Supplementary material for: Association of Adverse Childhood Experiences With Poor Neuropsychiatric Health and Dementia Among Former Professional US Football Players
Source: PubMed Central journal article supplement (PMC8941347; doi:10.1001/jamanetworkopen.2022.3299), 2022-03-22
Supplement: jamanetwopen-e223299-s001.pdf [file jamanetwopen-e223299-s001.pdf]

## Supplementary Online Content

Roberts AL, Zafonte R, Chibnik LB, et al. Association of adverse childhood experiences with poor neuropsychiatric health and dementia among former professional US football players. *JAMA Netw Open*. 2022;5(3):e223299. doi:10.1001/jamanetworkopen.2022.3299

**eTable 1.** Correlation of Childhood Adversities, Football Players Health Study, 2018-2021 (N = 1755)

**eTable 2.** Correlation of Neuropsychiatric Outcomes, Football Players Health Study, 2018-2021 (N = 1755)

**eTable 3.** Adverse Childhood Experiences (ACEs) and 6 Neuropsychiatric Health Outcomes, Football Players Health Study, 2018-2021 (N = 1755)

This supplementary material has been provided by the authors to give readers additional information about their work.

eTable 1. Correlation of Childhood Adversities, Football Players Health Study, 2018-2021 (N = 1755)

|                                          | Prevalence | Emotional abuse | Physical abuse | Sexual abuse | Emotional neglect | Physical neglect | Divorce | Intimate partner violence | Substance user | Mental illness | Prison |
|------------------------------------------|------------|-----------------|----------------|--------------|-------------------|------------------|---------|---------------------------|----------------|----------------|--------|
|                                          | N (%)      |                 |                |              |                   |                  |         |                           |                |                |        |
| Emotional abuse                          | 337 (19.3) | 1.00            | 0.59           | 0.13         | 0.34              | 0.22             | 0.23    | 0.35                      | 0.25           | 0.22           | 0.19   |
| Physical abuse                           | 363 (20.7) |                 | 1.00           | 0.14         | 0.28              | 0.24             | 0.17    | 0.35                      | 0.23           | 0.17           | 0.16   |
| Sexual abuse                             | 111 (6.3)  |                 |                | 1.00         | 0.11              | 0.15             | 0.13    | 0.12                      | 0.13           | 0.12           | 0.09   |
| Emotional neglect                        | 117 (6.7)  |                 |                |              | 1.00              | 0.31             | 0.13    | 0.21                      | 0.19           | 0.16           | 0.16   |
| Physical neglect                         | 82 (4.7)   |                 |                |              |                   | 1.00             | 0.19    | 0.28                      | 0.22           | 0.20           | 0.17   |
| Divorce/separation                       | 527 (30.2) |                 |                |              |                   |                  | 1.00    | 0.26                      | 0.27           | 0.16           | 0.21   |
| Intimate partner violence to mother      | 147 (8.4)  |                 |                |              |                   |                  |         | 1.00                      | 0.27           | 0.21           | 0.21   |
| Household member substance user          | 406 (23.2) |                 |                |              |                   |                  |         |                           | 1.00           | 0.23           | 0.23   |
| Household member mental illness/suicidal | 169 (9.7)  |                 |                |              |                   |                  |         |                           |                | 1.00           | 0.15   |
| Household member imprisoned              | 134 (7.7)  |                 |                |              |                   |                  |         |                           |                |                | 1.00   |

All correlations significant at  $P = .000$

eTable 2. Correlation of Neuropsychiatric Outcomes, Football Players Health Study, 2018-2021 (N = 1755)

|                                        |             | Positive dementia screen        | Poor cognition-related QoL | Probable depression | Probable anxiety | Pain severity | Pain interference |
|----------------------------------------|-------------|---------------------------------|----------------------------|---------------------|------------------|---------------|-------------------|
|                                        | N cases (%) | Pearson correlation coefficient |                            |                     |                  |               |                   |
| Positive dementia screen               | 752 (43.1)  | 1.00                            | 0.67                       | 0.45                | 0.36             | 0.28          | 0.39              |
| Poor cognition-related QoL             | 656 (37.7)  |                                 | 1.00                       | 0.50                | 0.37             | 0.29          | 0.38              |
| Probable moderate or severe depression | 291 (16.6)  |                                 |                            | 1.00                | 0.59             | 0.31          | 0.47              |
| Probable moderate or severe anxiety    | 194 (11.1)  |                                 |                            |                     | 1.00             | 0.29          | 0.41              |
| High pain severity                     | 556 (32.1)  |                                 |                            |                     |                  | 1.00          | 0.57              |
| High pain interference                 | 421 (24.2)  |                                 |                            |                     |                  |               | 1.00              |

All correlations significant at  $P < .0001$

eTable 3. Adverse Childhood Experiences (ACEs) and 6 Neuropsychiatric Health Outcomes, Football Players Health Study, 2018-2021 (N = 1755)

|                                                      | Adverse childhood experiences (ACEs) |                  |                         |                         |                         | Test of trend |
|------------------------------------------------------|--------------------------------------|------------------|-------------------------|-------------------------|-------------------------|---------------|
|                                                      | None<br>n=767                        | 1<br>n=400       | 2<br>n=245              | 3<br>n=135              | 4 or more<br>n=208      |               |
|                                                      | Risk ratio (95% confidence interval) |                  |                         |                         |                         | P value       |
| Outcome: Positive dementia screen                    |                                      |                  |                         |                         |                         |               |
| Base model adjusted for age, race, and childhood SES | 1.0 [Reference]                      | 1.10 (0.91-1.33) | 1.12 (0.92-1.39)        | <b>1.27 (1.00-1.59)</b> | <b>1.48 (1.22-1.79)</b> | <.001         |
| Further adjusted for concussions                     | 1.0 [Reference]                      | 1.04 (0.88-1.24) | 1.09 (0.89-1.33)        | 1.14 (0.93-1.40)        | <b>1.32 (1.10-1.58)</b> | .004          |
| Outcome: Poor cognition-related quality of life      |                                      |                  |                         |                         |                         |               |
| Base model adjusted for age, race, and childhood SES | 1.0 [Reference]                      | 1.14 (0.92-1.41) | <b>1.29 (1.03-1.62)</b> | <b>1.40 (1.09-1.80)</b> | <b>1.65 (1.33-2.04)</b> | <.001         |
| Further adjusted for concussions                     | 1.0 [Reference]                      | 1.08 (0.89-1.32) | <b>1.25 (1.02-1.55)</b> | <b>1.26 (1.00-1.59)</b> | <b>1.47 (1.21-1.79)</b> | <.001         |
| Outcome: Probable depression                         |                                      |                  |                         |                         |                         |               |
| Base model adjusted for age, race, and childhood SES | 1.0 [Reference]                      | 1.27 (0.89-1.82) | 0.78 (0.48-1.26)        | <b>1.65 (1.06-2.55)</b> | <b>1.62 (1.09-2.39)</b> | .01           |
| Further adjusted for concussions                     | 1.0 [Reference]                      | 1.20 (0.85-1.69) | 0.77 (0.49-1.22)        | 1.38 (0.92-2.06)        | 1.35 (0.93-1.97)        | .13           |
| Outcome: Probable anxiety                            |                                      |                  |                         |                         |                         |               |
| Base model adjusted for age, race, and childhood SES | 1.0 [Reference]                      | 1.21 (0.79-1.86) | 0.82 (0.48-1.40)        | 1.16 (0.63-2.12)        | 1.46 (0.89-2.39)        | .22           |
| Further adjusted for concussions                     | 1.0 [Reference]                      | 1.15 (0.77-1.72) | 0.85 (0.50-1.40)        | 0.96 (0.54-1.69)        | 1.21 (0.74-1.96)        | .71           |
| Outcome: Moderate or severe pain intensity           |                                      |                  |                         |                         |                         |               |
| Base model adjusted for age, race, and childhood SES | 1.0 [Reference]                      | 1.00 (0.79-1.27) | 1.05 (0.80-1.37)        | <b>1.46 (1.12-1.91)</b> | <b>1.48 (1.16-1.90)</b> | .001          |
| Further adjusted for concussions                     | 1.0 [Reference]                      | 0.97 (0.77-1.22) | 1.03 (0.79-1.33)        | <b>1.37 (1.06-1.77)</b> | <b>1.37 (1.07-1.74)</b> | .003          |
| Outcome: Moderate or severe pain interference        |                                      |                  |                         |                         |                         |               |
| Base model adjusted for age, race, and childhood SES | 1.0 [Reference]                      | 1.14 (0.85-1.54) | 1.34 (0.98-1.85)        | <b>1.75 (1.25-2.44)</b> | <b>1.74 (1.27-2.40)</b> | <.001         |
| Further adjusted for concussions                     | 1.0 [Reference]                      | 1.11 (0.84-1.48) | 1.33 (0.98-1.80)        | <b>1.60 (1.16-2.21)</b> | <b>1.56 (1.15-2.11)</b> | .001          |

Notes: Concussions are concussion symptoms at the time of football injury. Poor cognition-related quality of life indicates “moderate” or “severe” impairment on the Neuro-QOL. Bolded estimates are statistically significant.
